# Supplementary material for: Superparamagnetic ZnFe2O4 Nanoparticles-Reduced Graphene Oxide-Polyurethane Resin Based Nanocomposites for Electromagnetic Interference Shielding Application
Source: MDPI journal article supplement (doi:10.3390/nano11051112), 2021-04-25
Supplement: s1 [file s1]

## Supplementary Material

# Superparamagnetic ZnFe<sub>2</sub>O<sub>4</sub> Nanoparticles-Reduced Graphene Oxide-Polyurethane Resin Based Nanocomposites for Electromagnetic Interference Shielding Application

Raghvendra Singh Yadav <sup>1,\*</sup>, Anju <sup>1</sup>, Thaiskang Jamatia <sup>1</sup>, Ivo Kuřitka <sup>1</sup>, Jarmila Vilčáková <sup>1</sup>, David Škoda <sup>1</sup>, Pavel Urbánek <sup>1</sup>, Michal Machovský <sup>1</sup>, Milan Masar <sup>1</sup>, Michal Urbánek <sup>1</sup>, Lukas Kalina <sup>2</sup> and Jaromir Havlica <sup>2</sup>

<sup>1</sup> Centre of Polymer Systems, University Institute, Tomas Bata University in Zlín, Trida Tomase Bati 5678, 760 01 Zlín, Czech Republic; deswal@utb.cz (A.); jamatia@utb.cz (T.J.); kuritka@utb.cz (I.K.); vilcakova@utb.cz (J.V.); dskoda@utb.cz (D.Š.); urbanek@utb.cz (P.U.); machovsky@utb.cz (M.M.); masar@utb.cz (M.M.); murbanek@utb.cz (M.U.)

<sup>2</sup> Materials Research Centre, Brno University of Technology, Purkyňova 464/118, 61200 Brno, Czech Republic; kalina@fch.vut.cz (L.K.); havlica@fch.vut.cz (J.H.)

\* Correspondence: yadav@utb.cz; Tel.: +420-576031725

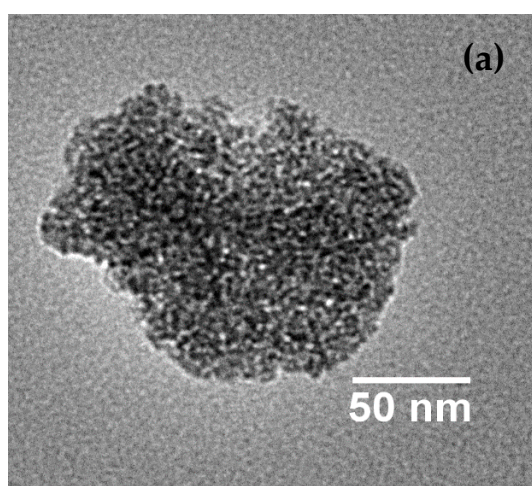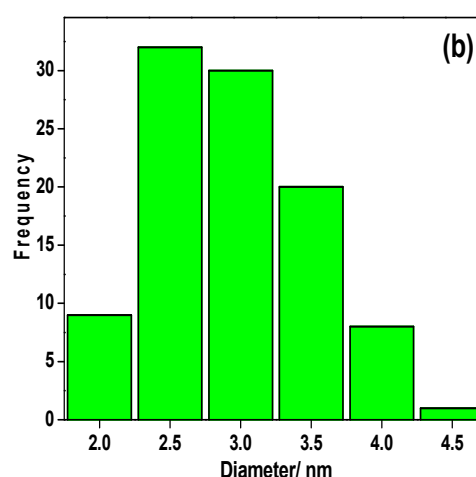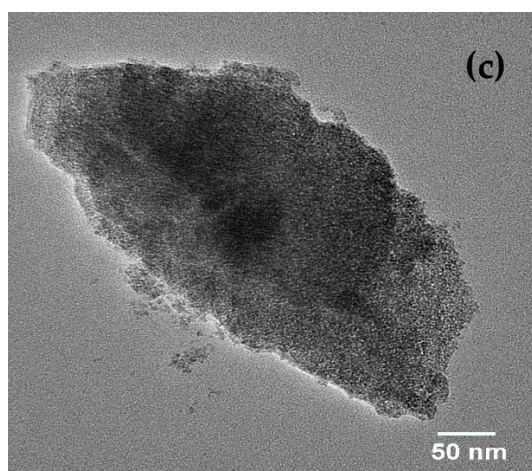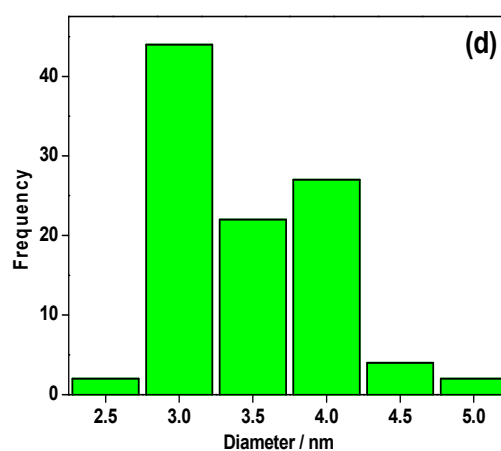

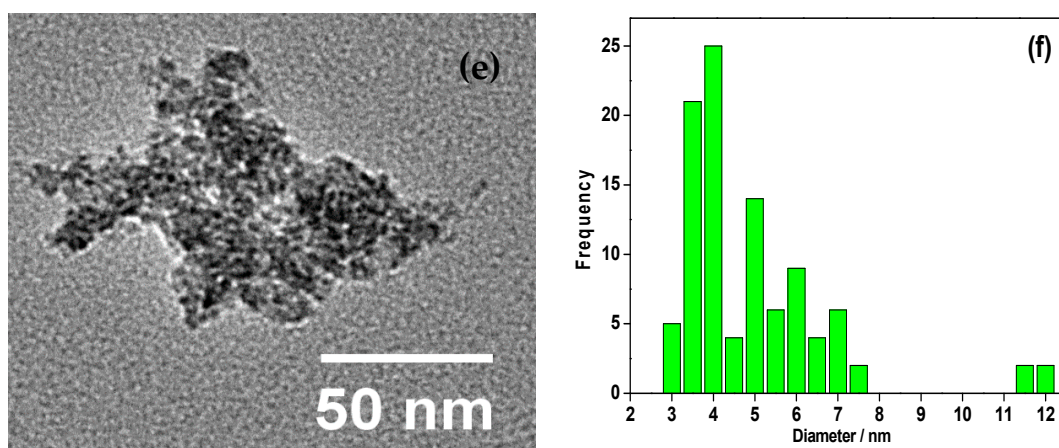

**Figure S1:** (a) TEM image of ZS25, (b) the size distribution of ZS25, (c) TEM image of ZS50, (d) the size distribution of ZS50, (e) TEM image of ZS100, and (f) the size distribution of ZS100.
